# Supplementary material for: Free-labelled fluorescent method for ATP detection assisted by T4 DNA ligase
Source: Royal Society of Chemistry journal article supplement (doi:10.1039/c6ay03266d), 2017-01-01
Supplement: c6ay03266d1.pdf [file c6ay03266d1.pdf]

## Supplementary Information

### Free-Labeled Fluorescent Method for ATP Detection Assisted by T4

#### DNA Ligase

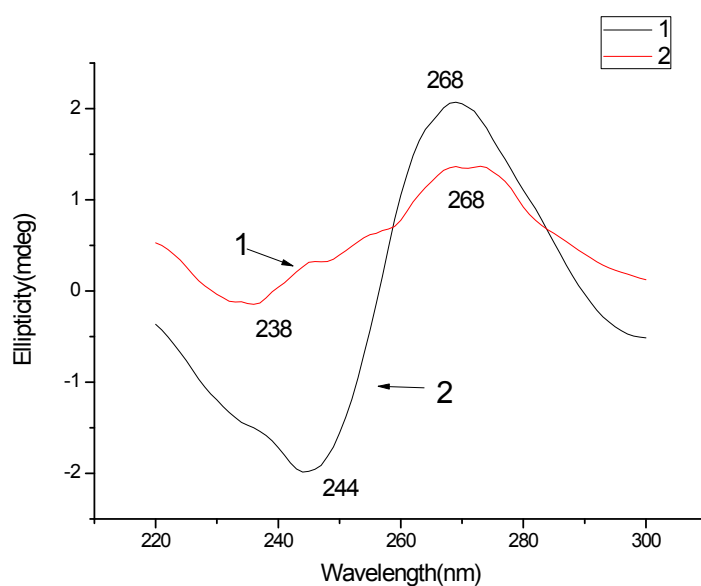

Figure S1 The CD Spectrum of Curve (1) 2  $\mu$ M G-DNA in 20 mM Tris/HCl (20 mM KCl, 70 mM NaCl, 10 mM MgCl<sub>2</sub>, pH 7.4), Curve(2) 1  $\mu$ M H1+1  $\mu$ M H2 +75 U T4+ 20 U ExoIII, in 20 mM Tris/HCl(20 mM KCl, 70 mM NaCl, 10 mM MgCl<sub>2</sub>, pH 7.4).

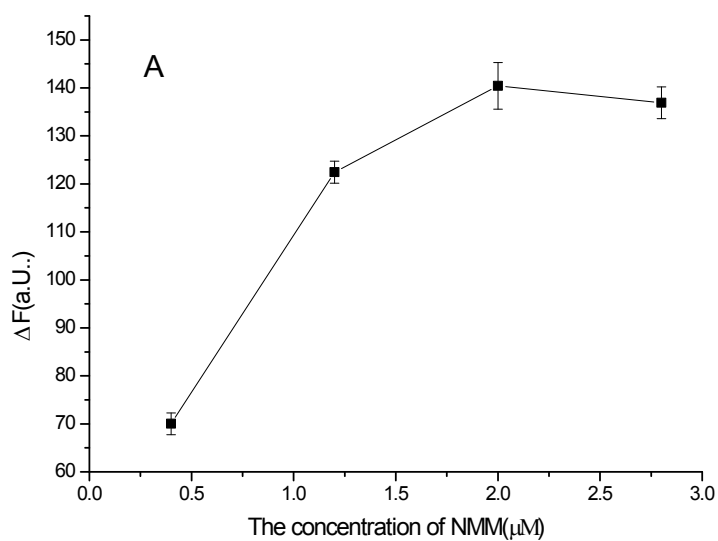

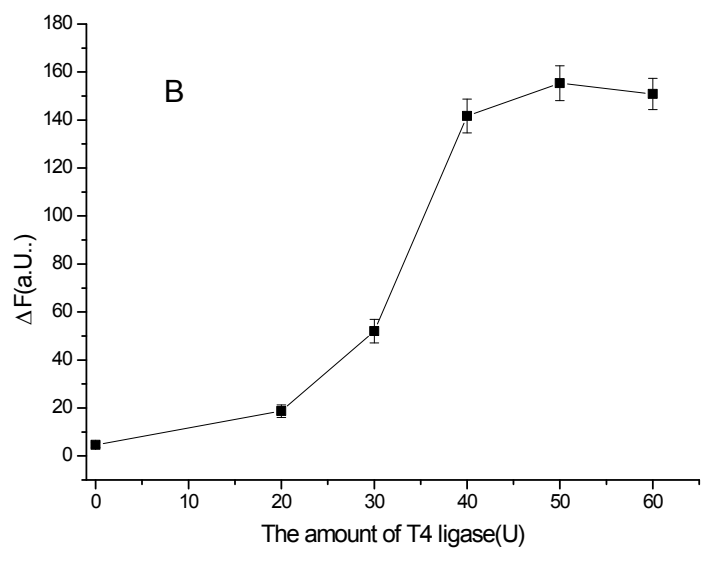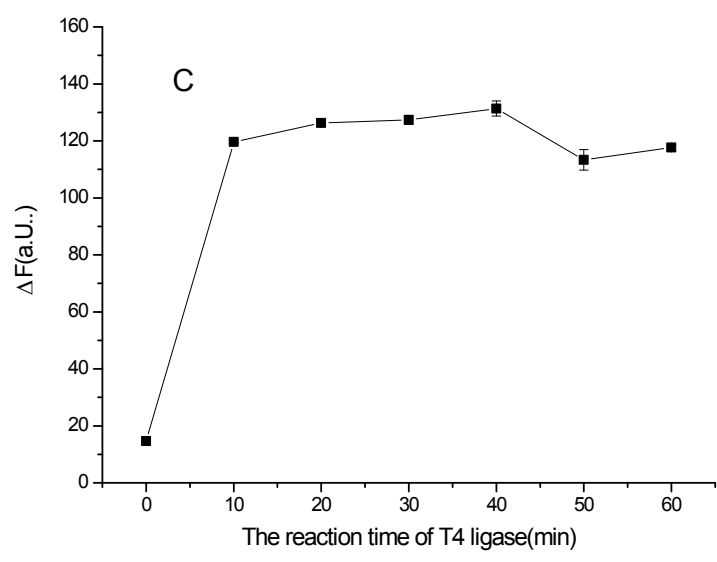

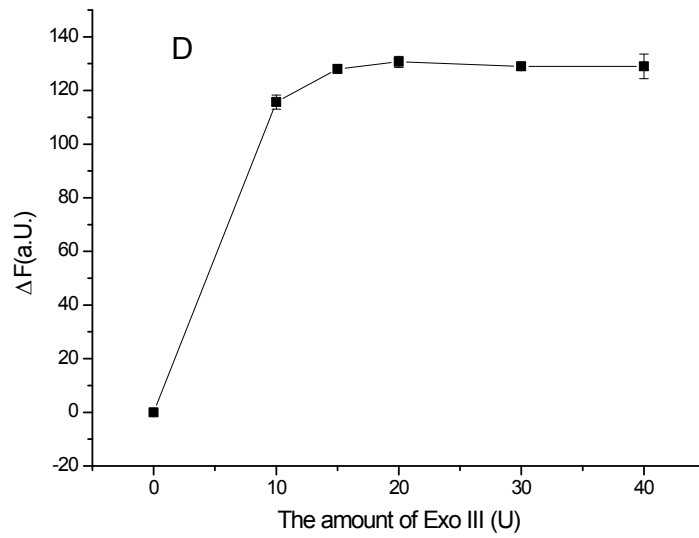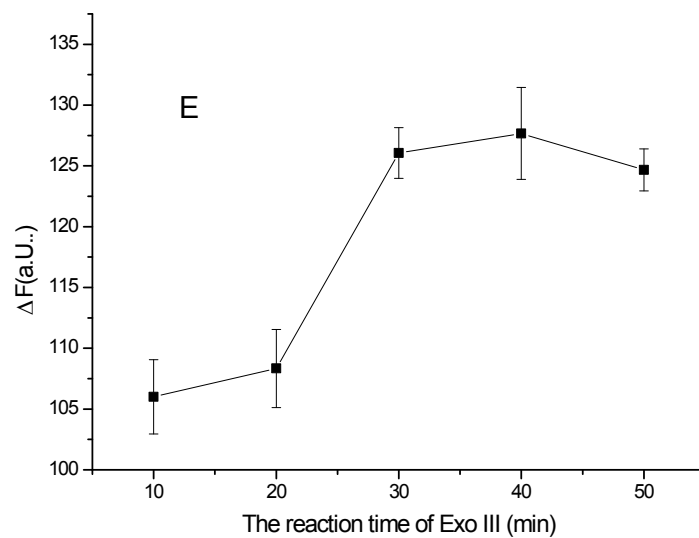

Figure S2 The effect of (A) the concentration of NMM; (B) the concentration of T4 DNA ligase; (C) the incubation time of T4 DNA ligase; (D) the concentration of T4 DNA ligase; (E) the incubation time of Exo III; on the fluorescence response of the ATP sensing system. The concentration of H1 and H2 was 100 nM and the concentration of ATP was 1.5  $\mu$ M. Error bars showed the standard deviation of three independent experiments.  $\Delta F$  was calculated by  $F_0 - F$ , where  $F$  and  $F_0$  represent fluorescence intensity in the presence and absence of ATP.

**Table S1 Comparison of the ATP analysis**

| Detection method | Detection range     | Detection limit  | reference |
|------------------|---------------------|------------------|-----------|
| Fluorescence     | 0.2 –50 $\mu$ M     | 93 nM            | 1         |
| Fluorescence     | 0.5 –50 $\mu$ M     | 140 nM           | 2         |
| Fluorescence     | 30 – 800 $\mu$ M    | 15 $\mu$ M       | 3         |
| Fluorescence     | 0.01 –1 $\mu$ M     | 4 nM             | 4         |
| Fluorescence     | Not clearly mention | 0.44 and 0.65 mM | 5         |
| Electrochemical  | 10 nM – 1 $\mu$ M   | 3.4 nM           | 6         |
| Fluorescence     | 5 – 300 nM          | 3.75 nM          | This work |

**Table S2 Recovery of ATP in spiked human serum samples**

| Samples | Added (nM) | Found (nM) | Recovery (%) | RSD (% , n=3) |
|---------|------------|------------|--------------|---------------|
| 1       | 40         | 39.8       | 99.4         | 7.2           |
| 2       | 60         | 62.9       | 104.9        | 6.2           |
| 3       | 120        | 115.0      | 95.9         | 4.8           |

## References

- 1 Q. W. Song, R. H. Wang, F. F. Sun, H. K. Chen, Z. K. Wang, N. N, and J. Ouyang, *Biosensors and Bioelectronics*, 2017, 87, 760–763.
- 2 Y. L. Wei, Y. X. Chen , H. H. Li , S. M. Shuang , C. Dong, and G. F. Wang, *Biosensors and Bioelectronics* 2015,63,311–316
- 3 Q. G. Chen, Q. Q. Guo, Y. Chen, J. Pang, F. F. Fu, and L. Q. Guo, *Talanta*, 2015, 138, 15–19.
- 4 X. Li, X. L. Ding, and J. Fan, *Analyst*, 2015, 140, 7918.
- 5 J. N. Xu, and C. Y. Wei , *Biosensors and Bioelectronics*, 2017, 87, 422–427
- 6 T. X. Hu, W. Wen, X. H. Zhang, S. F. Wang, *Analyst*, 2016, 141, 1506–1511
